# Supplementary material
Source: Research Square preprint supplement (doi:10.21203/rs.3.rs-9493709/v1)
Supplement: Supplementary file 1 [file 358bef0eb07f6e7572bd50ba.pdf]

# SAS CODE

## FIRST STEP: DATA = W.FOOT

```
proc import datafile="pathway" out=W.foot dbms=xlsx replace;
sheet="SAS";
getnames=yes;
run;
```

```
/*Volume of fat tissue*/
```

```
data W.foot;
set W.foot;
BV1_2C_Brozek=(FM_2C_Brozek/0.948);
BV1_2C_Lohman = (FM_2C_Lohman/0.9007);
BV1_2C_Siri = (FM_2C_Siri/0.9007);
BV1_3C_Siri = (FM_3C_Siri/0.9007);
run;
```

```
/*Volume of fat-free tissue*/
```

```
data W.foot;
set W.foot;
BV0_2C_Brozek= BV- BV1_2C_Brozek;
BV0_2C_Lohman = BV- BV1_2C_Lohman;
BV0_2C_Siri = BV- BV1_2C_Siri;
BV0_3C_Siri = BV- BV1_3C_Siri;
run;
```

```
/*density of fat-free tissue*/
```

```
data W.foot;
set W.foot;
d0_2C_Brozek= (FFM_2C_Brozek/ BV0_2C_Brozek);
d0_2C_Lohman= (FFM_2C_Lohman/ BV0_2C_Lohman);
d0_2C_Siri= (FFM_2C_Siri/ BV0_2C_Siri);
d0_3C_Siri= (FFM_3C_Siri/ BV0_3C_Siri);
```

```
run;
```

```
/* SUMMARIES FOR DEFINING SPECIFIC BC CUTOFFS*/
```

```
title "summaries for setting cutoffs";
```

```
proc means data=W.foot maxdec=5 mean std min max;
```

```
where dummyt=1;
```

```
var ... ;
```

```
run;
```

```
data W.foot;
```

```
set W.foot;
```

```
study_2C_BF = (((1.0293*1.12)/d)*((0.3091)/(1.12-1.0293))-((1.0293*0.3091)/(1.12-1.0293)))*100;
```

```
run;
```

```
proc print data=W.foot (obs=10);
```

```
run;
```

```
/*LOOKING FOR VARIABLES CORRELATION*/
```

```
title "correlation between dependents variables and circumferences";
```

```
proc corr data=W.foot rank nosimple plots=none;
```

```
where dummyt=1;
```

```
var stature ...;
```

```
with BV d;
```

```
id i;
```

```
run;
```

```
title "correlation between dependents variables and skinfolds";
```

```
proc corr data=W.foot rank nosimple plots=none;
```

```
where dummyt=1;
```

```
var ...;
```

```
with BV d;
```

```
id i;
run;

title "correlation between dependents variables and BIA parameters";
proc corr data=W.foot rank nosimple plots=none;
where dummyt=1;
var ...;
with BV d;
id i;
run;
```

```
PROC freq data=W.foot;
table catage;
where dummyt=1;
run;
```

```
title "Summary statistics for measured variables";
proc means data=W.foot maxdec=2 mean std cv median skew nolabels;
where dummyt=1;
class catage;
var &measures;
run;
```

```
title "Summary statistics for Body Composition variables";
proc means data=W.foot maxdec=2 mean std cv median skew nolabels;
where dummyt=1;
class catage;
var &BF &FM &FFM &d0_ &TBW;
run;
```

```
/*VARIABLES DISTRIBUTION*/
Title "Variables distributions";
```

```

proc univariate data=W.foot;
where dummyt=1;
var &measures &BF &FM &FFM &TBW;
histogram &measures &BF &FM &FFM &TBW/ normal lognormal;
inset mean std skewness/ position=ne;
run;

title "Selecting best regressors for BV prediction: Circumferences";
proc glmselect data=W.foot plots=(criteria candidates coefficients);
where dummyt=1;
class catage/ order=internal;
model BV= catage stature &Circ/selection=stepwise select=sl slstay=0.01 slentry=0.1 stats=all
details=all stb;
run;
quit;

title "Selecting best regressors for BV prediction: SK";
proc glmselect data=W.foot plots=(criteria candidates coefficients);
where dummyt=1;
class catage/ order=internal;
model BV= catage stature bic_m tric_m sub_m sopi_m sops_m thigh_m med_m/selection=stepwise
select=sl slstay=0.01 slentry=0.1 stats=all details=all stb;
run;
quit;
/*ONE-WAY ANOVA or KRUSKAL-WALLIS: comparisons between catage*/
title "One-Way ANOVA for anthropometrical measures comparisons between age categories";
proc glm data=W.foot plots=none;
where dummyt=1;
class catage;
id i;
model y=catage;
run;

```

```
quit;
```

```
title "One-Way ANOVA for BIA measures comparisons between age categories";
```

```
proc glm data=W.foot plots=none;
```

```
where dummyt=1;
```

```
class catage;
```

```
id i;
```

```
model y=catage;
```

```
run;
```

```
quit;
```

```
title "One-Way ANOVA for Body composition measures comparisons between age categories";
```

```
proc glm data=W.foot plots=none;
```

```
where dummyt=1;
```

```
class catage;
```

```
id i;
```

```
model y=catage;
```

```
run;
```

```
quit;
```

```
title "One-Way ANOVA for FM measures comparisons between age categories";
```

```
proc glm data=W.foot plots=none;
```

```
where dummyt=1;
```

```
class catage;
```

```
id i;
```

```
model y=catage;
```

```
run;
```

```
quit;
```

```
title "One-Way ANOVA for FFM measures comparisons between age categories";
```

```
proc glm data=W.foot plots=none;
```

```
where dummyt=1;
```

```
class catage;
id i;
model y=catage;
run;
quit;
```

```
title "One-Way ANOVA for FF tissue density comparisons between age categories";
proc glm data=W.foot plots=none;
where dummyt=1;
class catage;
id i;
model y=catage;
run;
quit;
```

```
title "One-Way ANOVA for Water measures comparisons between age categories";
proc glm data=W.foot plots=none;
where dummyt=1;
class catage;
id i;
model &p_w=catage;
run;
quit;
```

```
title "Kruskal-Wallis for non-parametric measures comparisons between age categories";
proc npar1way data=W.foot plots=none wilcoxon;
where dummyt=1;
class catage;
var y;
run;
```

```
/*MODELLING FOR BEST PREDICTORS*/
```

```

title "Selecting best regressors for BV prediction: BIA";

proc glmselect data=W.foot plots=(criteria candidates coefficients);

where dummyt=1;

class catage/ order=internal;

model BV= catage stature &BIA/selection=stepwise select=sl slstay=0.01 slentry=0.1 stats=all
details=all stb;

run;

quit;

```

```

/*MODELLING FOR BEST PREDICTORS_ polynomial models*/

title "Selecting best regressors for BV prediction: Circumferences";

proc glmselect data=W.foot plots=(criteria candidates coefficients);

where dummyt=1;

class catage/ order=internal;

model BV= catage stature stat_sq &Circ &Circ_sq/selection=stepwise select=sl slstay=0.01
slentry=0.1 stats=all details=all stb;

run;

quit;

```

```

title "Selecting best regressors for BV prediction: SK";

proc glmselect data=W.foot plots=(criteria candidates coefficients);

where dummyt=1;

class catage/ order=internal;

model BV= catage stature stat_sq bic_m tric_m sub_m sopi_m sops_m thigh_m med_m
          bic_m_sq tric_m_sq sub_m_sq sopi_m_sq sops_m_sq thigh_m_sq
med_m_sq/selection=backward select=sl slstay=0.01 slentry=0.1 stats=all details=all stb;

run;

quit;

```

```

title "Selecting best regressors for BV prediction: BIA";

proc glmselect data=W.foot plots=(criteria candidates coefficients);

where dummyt=1;

class catage/ order=internal;

```

```

model BV= catage stature stat_sq &BIA &BIA_sq/selection=backward select=sl slstay=0.01 slentry=0.1
stats=all details=all stb;

run;

quit;

/*Generating dummy for reg procedure*/

Data W.foot;

set W.foot;

dummycat=1;

if catage=2 then dummycat=0;

run;

proc format;

value dummycat

           0 ="adult"

           1= "adolescent"

;

run;

data W.foot;

set W.foot;

format dummycat dummycat.;

run;

/*model diagnostic*/

data W.foot;

set W.foot;

d_BV_C=1;

if i=43 then d_BV_C=0;

run;

title "BV by circumferences: model diagnostic";

proc reg data=W.foot plots=(diagnostics(stats=all) dfbetas cooksd fitplot) noprint;

where dummyt=1 and d_BV_C=1;

id i;

```

```
model BV= dummycat stature arm_rel hip thigh calf/ r p b cli clm clb vif acov spec dwprob white;  
output out=W.foot r=res_BV_C p=yhat_BV_C;  
run;  
quit;
```

## SECOND STEP: DATA = FOOT

```
proc import datafile="pathway" out=foot dbms=xls replace;
sheet="SAS";
getnames=yes;
run;

proc sort data=foot;

by t i;

run;

proc format;
value catage
    1 = "adolescent"
    2 = "adult";

run;

data foot;

set foot;

format catage catage.;

run;

/*Generating dummy for reg procedure*/

Data foot;

set foot;

dummyscat=1;

if catage=2 then dummyscat=0;

run;

proc format;
value dummyscat
    0 ="adult"
    1= "adolescent"

;

run;

data foot;

set foot;
```

```

format dummycat dummycat.;

run;

proc print data=foot (obs=1);

run;

/* CORRELATIONS PLOTS*/

title "Scatter plots for circumferences over categories";

proc sgscatter data=foot datacolors=(CX98FB98) DATACONTRASTCOLORS=(black gray)
datasymbols=(trianglefilled) datalinepatterns=(shortdash) pad=0;

where dummyt=1;

compare y=BV x=(arm_rel arm_str hip thigh calf)/reg=(lineattrs=(thickness=3)) group=catage nowall
MARKERATTRS=(size=15);

label BV="Body Volume [L]" arm_rel= "relaxed arm" arm_str="stretched arm" catage="category" ;

run;

title "Scatter plots for skinfolds over categories";

proc sgscatter data=foot datacolors=(CX98FB98) DATACONTRASTCOLORS=(black gray)
datasymbols=(trianglefilled) datalinepatterns=(shortdash) pad=0;

where dummyt=1;

compare y=BV x=(bic tric sub sopi sops thigh_1 med)/reg=(lineattrs=(thickness=3)) group=catage
nowall MARKERATTRS=(size=15);

label BV= "Body Volume [L]" d="Body Density [kg/L]" bic="biceps" tric="triceps" sub="subscapular"
sopi="soprailiac" sops="supraspinal" thigh_1="thigh" med="medialcalf" catage="category";

run;

title "Scatter plots for BIA over categories";

proc sgscatter data=foot datacolors=(CX98FB98) DATACONTRASTCOLORS=(black gray)
datasymbols=(trianglefilled) datalinepatterns=(shortdash) pad=0;

where dummyt=1;

compare y=BV x=(R Xc PhA)/reg=(lineattrs=(thickness=3)) group=catage nowall
MARKERATTRS=(size=15);

label BV= "Body Volume [L]" d="Body Density [kg/L]" catage="category";

run;

```

```

title "Scatter plots for circumferences over categories";

proc sgscatter data=foot datacolors=(CX98FB98) DATACONTRASTCOLORS=(black gray)
datasymbols=(trianglefilled) datalinepatterns=(shortdash) pad=0;

where dummyt=1;

compare y=d x=(arm_rel arm_str hip thigh)/reg=(lineattrs=(thickness=3)) group=catage nowall
MARKERATTRS=(size=15);

label BV= "Body Volume [L]" d="Body Density [kg/L]" arm_rel= "relaxed arm" arm_str="stretched arm"
catage="category";

run;

```

```

title "Scatter plots for skinfolds over categories";

proc sgscatter data=foot datacolors=(CX98FB98) DATACONTRASTCOLORS=(black gray)
datasymbols=(trianglefilled) datalinepatterns=(shortdash) pad=0;

where dummyt=1;

compare y=d x=(bic tric sub sopi sops thigh_1 med)/reg=(lineattrs=(thickness=3)) group=catage nowall
MARKERATTRS=(size=15);

label BV= "Body Volume [L]" d="Body Density [kg/L]" bic="biceps" tric="triceps" sub="subscapular"
sopi="soprailiac" sops="supraspinal" thigh_1="thigh" med="medialcalf" catage="category";

run;

```

```

title "Scatter plots for BIA over categories";

proc sgscatter data=foot datacolors=(CX98FB98) DATACONTRASTCOLORS=(black gray)
datasymbols=(trianglefilled) datalinepatterns=(shortdash) pad=0;

where dummyt=1;

compare y=d x=(R Xc PhA)/reg=(lineattrs=(thickness=3)) group=catage nowall
MARKERATTRS=(size=15);

label BV= "Body Volume [L]" d="Body Density [kg/L]" catage="category";

run;

```

```

/*model diagnostic*/

data foot;

set foot;

d_BV_C=1;

if i=43 then d_BV_C=0;

run;

```

```

ods graphics on;
title "BV by circumferences: model diagnostic";
proc reg data=foot plots=(diagnostics(stats=all) dfbetas cooks d fitplot) noprint;
where dummyt=1 and d_BV_C=1;
id i;
model BV= dummycat stature arm_rel hip thigh calf/ r p b cli clm clb vif acov spec dwprob white;
output out=analysis r=res_BV_C p=yhat_BV_C;
run;
quit;

/*Fitline plot*/
proc sgplot data=analysis;
where dummyt=1 and d_BV_C=1;
styleattrs axisextent=data bgcolor=white wallcolor=white datacontrastcolors=(black gray);
loess x=yhat_BV_C y=BV / group=dummycat markerattrs=(symbol=trianglefilled size=8)
      clm clmattrs=(clmfillattrs=(color=ltgray transparency=0.6) clmlineattrs=(color=black
thickness=2)) lineattrs=(pattern=dash thickness=2);
reg x=yhat_BV_C y=BV/ nomarkers lineattrs=(color=black pattern=solid thickness=2);
yaxis label="BV by ADP" labelattrs=(size=14 weight=bold) valueattrs=(size=10 weight=bold);
xaxis label="Predicted BV by circumferences" labelattrs=(size=14 weight=bold) valueattrs=(size=10
weight=bold);
keylegend / title="" position=bottom valueattrs=(size=12);
title "Fit plot";
run;

/*Bland & Altman plot*/
data analysis /*generate a new work data for maintaining foot values*/;
set analysis;
diff_BV_C = BV - yhat_BV_C;
avg_BV_C = (BV + yhat_BV_C) / 2;
run;

```

```

proc sql noprint;
    select mean(diff_BV_C), std(diff_BV_C) into :mean_d_BV_C, :std_d_BV_C
    from analysis;
quit;
/* Calculate the upper and lower limits of agreement */
%let BV_C_loa_up = %sysevalf(&mean_d_BV_C + 1.96* &std_d_BV_C);
%let BV_C_loa_low = %sysevalf(&mean_d_BV_C - 1.96* &std_d_BV_C);

title "BLAND & ALTMAN PLOT FOR BV PREDICITION BY CIRCUMFERENCE";
proc sgplot data=analysis;
styleattrs axisextent=data bgcolor=white wallcolor=white datacontrastcolors=(black gray);
scatter x=avg_BV_C y=diff_BV_C /group=dummycat markerattrs=(symbol=trianglefilled size=8);
    /* Add the Mean Difference Line */
refline &mean_d_BV_C / axis=y lineattrs=(thickness=2 color=ltgray) label="Mean Diff:
%sysfunc(putn(&mean_d_BV_C, 5.2))";
    /* Add the Upper and Lower Limits of Agreement */
refline &BV_C_loa_up &BV_C_loa_low / axis=y lineattrs=(pattern=dash color=ltgray) label=("+1.96*std"
"-1.96*std");
refline 0 / axis=y lineattrs=(pattern=dot thickness=2 color=black);
yaxis label="BV by ADP - predicted BV" labelattrs=(size=14 weight=bold) valueattrs=(size=10
weight=bold) min=-5 max=5;
xaxis label="Mean of BV by ADP and predicted BV" labelattrs=(size=14 weight=bold)
valueattrs=(size=10 weight=bold);
keylegend / title="" position=bottom valueattrs=(size=12);
title "Bland & Altman plot: ADP vs circumferences";
run;

proc print data=analysis (obs=3);
run;

/*LIN'S CCC*/
proc corr data=analysis outp=CCC noprint;

```

```

var BV yhat_BV_C;

run;

data analysis;
set CCC(where=( _type_='CORR' and _name_='BV'));
  /* Pearson's r */
  r_BV_C = yhat_BV_C;
set CCC(where=( _type_='STD'));
  s1 = BV;
  s2 = yhat_BV_C;
set CCC(where=( _type_='MEAN'));
  m1 = BV;
  m2 = yhat_BV_C;
  /* The 'C_b' bias correction factor */
  v = s1 / s2;
  u = (m1 - m2) / sqrt(s1 * s2);
  cb_BV_C = 2 / (v + (1/v) + u**2);
  /* Lin's CCC */
  ccc_BV_C = r_BV_C * cb_BV_C;
keep r_BV_C cb_BV_C ccc_BV_C;
run;

title "Lin's Coefficient";
proc print data=CCC;
run;

/*MODEL BY SKINFOLD THICKNESSESS*/
data foot;
set foot;
d_BV_SK=1;
if i=56 then d_BV_SK=0;
run;

```

```

/*BEST MODEL*/
title "BV by SK: model diagnostic without i=56";
proc reg data=foot plots=(diagnostics(stats=all) dfbetas cooks d fitplot) noprint;
where dummyt=1 and d_BV_SK=1;
id i;
model BV= dummycat stature sub/ r p b cli clm clb vif acov spec dwprob white;
output out=analysis r=res_BV_SK p=yhat_BV_SK;
run;
quit;
/*fi plot SK*/
proc sgplot data=analysis;
where dummyt=1 and d_BV_SK=1;
styleattrs axisextent=data bgcolor=white wallcolor=white datacontrastcolors=(black gray);
loess x=yhat_BV_SK y=BV / group=dummycat/*NEW*/ markerattrs=(symbol=trianglefilled size=8)
      clm clmattrs=(clmfillattrs=(color= ltgray transparency=0.6)) lineattrs=(pattern=dash
thickness=2);
reg x=yhat_BV_SK y=BV/ nomarkers lineattrs=(color=black pattern=solid thickness=2);
yaxis label="BV by ADP" labelattrs=(size=14 weight=bold) valueattrs=(size=10 weight=bold);
xaxis label="Predicted BV by SK" labelattrs=(size=14 weight=bold) valueattrs=(size=10 weight=bold);
keylegend / title="" position=bottom valueattrs=(size=12);
title "Fit plot";
run;

/*Bland & Altman plot*/
data analysis /*generate a new work data for maintaining foot values*/;
set analysis;
diff_BV_SK = BV - yhat_BV_SK;
avg_BV_SK = (BV + yhat_BV_SK) / 2;
run;

proc sql noprint;

```

```

select mean(diff_BV_SK), std(diff_BV_SK) into :mean_d_BV_SK, :std_d_BV_SK

from analysis;

quit;

/* Calculate the upper and lower limits of agreement */
%let BV_SK_loa_up = %sysevalf(&mean_d_BV_SK + 1.96* &std_d_BV_SK);
%let BV_SK_loa_low = %sysevalf(&mean_d_BV_SK - 1.96* &std_d_BV_SK);

title1 "BLAND & ALTMAN PLOT FOR BV PREDICITION BY SK";

proc sgplot data=analysis;

styleattrs axisextent=data bgcolor=white wallcolor=white datacontrastcolors=(black gray);

scatter x=avg_BV_SK y=diff_BV_SK / group=dummycat/*NEW*/ markerattrs=(symbol=trianglefilled
size=8);

/* Add the Mean Difference Line */

refline &mean_d_BV_SK / axis=y lineattrs=(thickness=2 color=ltgray) label="Mean Diff:
%sysfunc(putn(&mean_d_BV_C, 5.2))";

/* Add the Upper and Lower Limits of Agreement */

refline &BV_SK_loa_up &BV_SK_loa_low / axis=y lineattrs=(pattern=dash color=ltgray)
label=("+1.96*std" "-1.96*std");

refline 0 / axis=y lineattrs=(pattern=dot thickness=2 color=black);

yaxis label="BV by ADP - predicted BV" labelattrs=(size=14 weight=bold) valueattrs=(size=10
weight=bold) min=-10 max=10;

xaxis label="Mean of BV by ADP and predicted BV" labelattrs=(size=14 weight=bold)
valueattrs=(size=10 weight=bold);

keylegend / title="" position=bottom valueattrs=(size=12);

title "Bland & Altman Plot: ADP vs SK";

run;

/*LIN'S CCC*/

proc corr data=analysis outp=CCC noprint;

var BV yhat_BV_SK;

run;

data lin_sk;

```

```

set CCC(where=(_type_='CORR' and _name_='BV'));

/* Pearson's r */
r_BV_SK = yhat_BV_SK;

set CCC(where=(_type_='STD'));

s1 = BV;
s2 = yhat_BV_SK;

set CCC(where=(_type_='MEAN'));

m1 = BV;
m2 = yhat_BV_SK;

/* The 'C_b' bias correction factor */
v = s1 / s2;
u = (m1 - m2) / sqrt(s1 * s2);
cb_BV_SK = 2 / (v + (1/v) + u**2);

/* Lin's CCC */
ccc_BV_SK = r_BV_SK * cb_BV_SK;
keep r_BV_SK cb_BV_SK ccc_BV_SK;

run;

title "Lin's Coefficient";

proc print data=CCC;

run;

proc print data=lin_sk;

run;

/*BIA MODEL DIAGNOSTIC*/

title "BV by BIA: model diagnostic";

proc reg data=foot plots=(diagnostics(stats=all) dfbetas cooks d fitplot) noprint;
where dummyt=1;

id i;

model BV= dummycat stature R / r p b cli clm clb vif acov spec dwprob white;

output out=analysis r=res_BV_BIA p=yhat_BV_BIA;

run;

quit;

```

```

/*fit plot BIA*/
proc sgplot data=analysis;
where dummyt=1;
styleattrs axisextent=data bgcolor=white wallcolor=white datacontrastcolors=(black gray);
loess x=yhat_BV_BIA y=BV / group=dummycat/*NEW*/ markerattrs=(symbol=trianglefilled size=8)
      clm clmattrs=(clmfillattrs=(color= ltgray transparency=0.6)) lineattrs=(pattern=dash
thickness=2);
reg x=yhat_BV_BIA y=BV/ nomarkers lineattrs=(color=black pattern=solid thickness=2);
yaxis label="BV by ADP" labelattrs=(size=14 weight=bold) valueattrs=(size=10 weight=bold);
xaxis label="Predicted BV by BIA" labelattrs=(size=14 weight=bold) valueattrs=(size=10 weight=bold);
keylegend / title="" position=bottom valueattrs=(size=12);
title "Fit plot";
run;

```

```

/*Bland & Altman plot*/
data analysis /*generate a new work data for maintaining foot values*/;
set analysis;
diff_BV_BIA = BV - yhat_BV_BIA;
avg_BV_BIA = (BV + yhat_BV_BIA) / 2;
run;

```

```

proc sql noprint;
  select mean(diff_BV_BIA), std(diff_BV_BIA) into :mean_d_BV_BIA, :std_d_BV_BIA
  from analysis;
quit;

```

```

/* Calculate the upper and lower limits of agreement */
%let BV_BIA_loa_up = %sysevalf(&mean_d_BV_BIA + 1.96* &std_d_BV_BIA);
%let BV_BIA_loa_low = %sysevalf(&mean_d_BV_BIA - 1.96* &std_d_BV_BIA);

```

```

title1 "BLAND & ALTMAN PLOT FOR BV PREDICITION BY BIA";
proc sgplot data=analysis;

```

```

styleattrs axisextent=data bgcolor=white wallcolor=white datacontrastcolors=(black gray);

scatter x=avg_BV_BIA y=diff_BV_BIA / group=dummycat/*NEW*/ markerattrs=(symbol=trianglefilled
size=8);

/* Add the Mean Difference Line */

refline &mean_d_BV_BIA / axis=y lineattrs=(thickness=2 color=ltgray) label="Mean Diff:
%sysfunc(putn(&mean_d_BV_C, 5.2))";

/* Add the Upper and Lower Limits of Agreement */

refline &BV_BIA_loa_up &BV_BIA_loa_low / axis=y lineattrs=(pattern=dash color=ltgray)
label=("+1.96*std" "-1.96*std");

refline 0 / axis=y lineattrs=(pattern=dot thickness=2 color=black);

yaxis label="BV by ADP - predicted BV" labelattrs=(size=14 weight=bold) valueattrs=(size=10
weight=bold) min=-10 max=10;

xaxis label="Mean of BV by ADP and predicted BV" labelattrs=(size=14 weight=bold)
valueattrs=(size=10 weight=bold);

keylegend / title="" position=bottom valueattrs=(size=12);

title "Bland & Altman Plot: ADP vs BIA";

run;

/*LIN'S CCC*/

proc corr data=analysis outp=CCC noprint;

var BV yhat_BV_BIA;

run;

data lin_bia;

set CCC(where=( _type_='CORR' and _name_='BV'));

/* Pearson's r */

r_BV_BIA = yhat_BV_BIA;

set CCC(where=( _type_='STD'));

s1 = BV;

s2 = yhat_BV_BIA;

set CCC(where=( _type_='MEAN'));

m1 = BV;

m2 = yhat_BV_BIA;

```

```

/* The 'C_b' bias correction factor */
v = s1 / s2;
u = (m1 - m2) / sqrt(s1 * s2);
cb_BV_BIA = 2 / (v + (1/v) + u**2);
/* Lin's CCC */
ccc_BV_BIA = r_BV_BIA * cb_BV_BIA;
keep r_BV_BIA cb_BV_BIA ccc_BV_BIA;
run;

title "Lin's Coefficient";
proc print data=CCC;
run;

proc print data=lin_bia;
run;

title "BV by circumferences: model diagnostic";
/*TEST-RETEST FOR MODEL RELIABILITY*/
/*SAVING MODEL PREDICTION ON foot*/
data foot;
set foot;

BVhat_ANT= -
102.45967+(1.10793*dummyscat)+(0.35439*stature)+(0.51682*arm_rel)+(0.57547*hip)+(0.51166*thigh)+(0.54422*calf);

BVhat_SK= -49.56459+(-1.51037*dummyscat)+(0.56847*stature)+(1.45497*sub);
BVhat_BIA= -43.47204+(1.36433*dummyscat)+(0.76056*stature)+(-0.04875*R);

run;

data foot;
set foot;

FFM_2C_Study=BM-FM_2C_Study;

run;

PROC PRINT DATA=foot (obs=3);

```

```
run;
```

```
proc sort data=foot;
```

```
by t dummycat;
```

```
run;
```

```
title "descriptive statistic of predictions by time";
```

```
proc means data=foot n mean std cv maxdec=2;
```

```
by t dummycat;
```

```
var BVhat_ANT BVhat_SK BVhat_BIA BV FM_2C_Brozek FM_2C_Lohman FM_2C_Pace FM_2C_Siri  
FM_3C_Siri FM_2C_study BF_2C_Brozek BF_2C_Lohman BF_2C_Pace BF_2C_Siri BF_3C_Siri  
BF_2C_Study FFM_2C_Brozek FFM_2C_Lohman FFM_2C_Pace FFM_2C_Siri FFM_3C_Siri  
FFM_2C_Study ;
```

```
run;
```

```
/*PAIRED T-TEST FOR COMPLETE VALIDATION*/
```

```
title "Paired student test for model reliability";
```

```
proc ttest data=foot sides=2 plots(unpack)=summary;
```

```
class t;
```

```
var BVhat_ANT BVhat_SK BVhat_BIA BV;
```

```
run;
```

```
title "Paired student test for model reliability";
```

```
proc ttest data=foot sides=2 plots(unpack)=summary;
```

```
by dummycat;
```

```
class t;
```

```
var BVhat_ANT BVhat_SK BVhat_BIA BV;
```

```
run;
```

```
title "Paired student test for model accuracy and precision";
```

```
proc ttest data=foot sides=2 plots=(histogram boxplot agreement);
```

```
paired (BVhat_ANT BVhat_SK BVhat_BIA)* BV;
```

```
label BVhat_ANT="predicted BV by ANT" BVhat_SK="predicted BV by SK" BVhat_BIA="predicted BV by BIA" BV="Body Volume by ADP";
```

```
run;
```

```
/*LIN CCC at retest*/
```

```
ods graphics on;
```

```
title "BV by circumferences: model re-test diagnostic";
```

```
proc reg data=foot plots=diagnostic noprint;
```

```
where t=2;
```

```
id i;
```

```
model BV= dummymcat stature arm_rel hip thigh calf;
```

```
output out=analysis r=res_BV_C_post p=yhat_BV_C_post;
```

```
run;
```

```
quit;
```

```
/*Fitline plot*/
```

```
proc sgplot data=analysis;
```

```
where t=2;
```

```
styleattrs axisextent=data bgcolor=white wallcolor=white datacontrastcolors=(black gray);
```

```
loess x=yhat_BV_C_post y=BV / group=dummymcat markerattrs=(symbol=trianglefilled size=8)
```

```
          clm clmattrs=(clmfillattrs=(color=ltgray transparency=0.6) clmlineattrs=(color=black  
thickness=2)) lineattrs=(pattern=dash thickness=2);
```

```
reg x=yhat_BV_C_post y=BV/ nomarkers lineattrs=(color=black pattern=solid thickness=2);
```

```
yaxis label="BV by ADP" labelattrs=(size=14 weight=bold) valueattrs=(size=10 weight=bold);
```

```
xaxis label="Predicted BV by circumferences" labelattrs=(size=14 weight=bold) valueattrs=(size=10  
weight=bold);
```

```
keylegend / title="" position=bottom valueattrs=(size=12);
```

```
title "Fit plot at retest";
```

```
run;
```

```
/*Bland & Altman plot*/
```

```
data analysis /*generate a new work data for maintaining foot values*/;
```

```
set analysis;
```

```

diff_BV_C_post = BV - yhat_BV_C_post;

avg_BV_C_post = (BV + yhat_BV_C_post) / 2;

run;

proc sql noprint;
    select mean(diff_BV_C_post), std(diff_BV_C_post) into :mean_d_BV_C_post, :std_d_BV_C_post
    from analysis;
quit;

/* Calculate the upper and lower limits of agreement */
%let BV_C_loa_up_post = %sysevalf(&mean_d_BV_C_post + 1.96* &std_d_BV_C_post);
%let BV_C_loa_low_post = %sysevalf(&mean_d_BV_C_post - 1.96* &std_d_BV_C_post);

title "BLAND & ALTMAN PLOT FOR BV PREDICITION BY CIRCUMFERENCE at retest";

proc sgplot data=analysis;

styleattrs axisextent=data bgcolor=white wallcolor=white datacontrastcolors=(black gray);

scatter x=avg_BV_C_post y=diff_BV_C_post / group=dummycat markerattrs=(symbol=trianglefilled
size=8);

    /* Add the Mean Difference Line */

refline &mean_d_BV_C_post / axis=y lineattrs=(thickness=2 color=ltgray) label="Mean Diff:
%sysfunc(putn(&mean_d_BV_C_post, 5.2))";

    /* Add the Upper and Lower Limits of Agreement */

refline &BV_C_loa_up_post &BV_C_loa_low_post / axis=y lineattrs=(pattern=dash color=ltgray)
label=(" +1.96*std" "-1.96*std");

refline 0 / axis=y lineattrs=(pattern=dot thickness=2 color=black);

yaxis label="BV by ADP - predicted BV" labelattrs=(size=14 weight=bold) valueattrs=(size=10
weight=bold) min=-5 max=5;

xaxis label="Mean of BV by ADP and predicted BV" labelattrs=(size=14 weight=bold)
valueattrs=(size=10 weight=bold);

keylegend / title="" position=bottom valueattrs=(size=12);

title "Bland & Altman plot: ADP vs circumferences at retest";

run;

/*LIN'S CCC*/

```

```

proc corr data=analysis outp=CCC noprint;
var BV yhat_BV_C_post;
run;

data analysis;
set CCC(where=( _type_='CORR' and _name_='BV'));
  /* Pearson's r */
  r_BV_C_post = yhat_BV_C_post;
set CCC(where=( _type_='STD'));
  s1 = BV;
  s2 = yhat_BV_C_post;
set CCC(where=( _type_='MEAN'));
  m1 = BV;
  m2 = yhat_BV_C_post;
  /* The 'C_b' bias correction factor */
  v = s1 / s2;
  u = (m1 - m2) / sqrt(s1 * s2);
  cb_BV_C_post = 2 / (v + (1/v) + u**2);
  /* Lin's CCC */
  ccc_BV_C_post = r_BV_C_post * cb_BV_C_post;
keep r_BV_C_post cb_BV_C_post ccc_BV_C_post;
run;
title "Lin's CCC";
proc print data=CCC;
run;
proc print data=analysis;
run;

/*MODEL BY SKINFOLD THICKNESSESS*/
title "BV by SK: model diagnostic at retest";
proc reg data=foot plots=diagnostics noprint;
where t=2;

```

```

id i;

model BV= dummycat stature sub;

output out=analysis r=res_BV_SK p=yhat_BV_SK;

run;

quit;

/*Fitline plot*/

proc sgplot data=analysis;

where t=2;

styleattrs axisextent=data bgcolor=white wallcolor=white datacontrastcolors=(black gray);

loess x=yhat_BV_SK y=BV / group=dummycat/*NEW*/ markerattrs=(symbol=trianglefilled size=8)

      clm clmattrs=(clmfillattrs=(color=ltgray transparency=0.6) clmlineattrs=(color=black
thickness=2)) lineattrs=(pattern=dash thickness=2);

reg x=yhat_BV_SK y=BV/ nomarkers lineattrs=(color=black pattern=solid thickness=2);

yaxis label="BV by ADP" labelattrs=(size=14 weight=bold) valueattrs=(size=10 weight=bold);

xaxis label="Predicted BV by SK" labelattrs=(size=14 weight=bold) valueattrs=(size=10 weight=bold);

keylegend / title="" position=bottom valueattrs=(size=12);

title "Fit plot at retest";

run;

/*Bland & Altman plot*/

data analysis /*generate a new work data for maintaining foot values*/;

set analysis;

diff_BV_SK = BV - yhat_BV_SK;

avg_BV_SK = (BV + yhat_BV_SK) / 2;

run;

proc sql noprint;

  select mean(diff_BV_SK), std(diff_BV_SK) into :mean_d_BV_SK, :std_d_BV_SK

  from analysis;

quit;

/* Calculate the upper and lower limits of agreement */

%let BV_SK_loa_up = %sysevalf(&mean_d_BV_SK + 1.96* &std_d_BV_SK);

```

```

%let BV_SK_loa_low = %sysevalf(&mean_d_BV_SK - 1.96* &std_d_BV_SK);

title1 "BLAND & ALTMAN PLOT FOR BV PREDICITION BY SK at retest";

proc sgplot data=analysis;

styleattrs axisextent=data bgcolor=white wallcolor=white datacontrastcolors=(black gray);

scatter x=avg_BV_SK y=diff_BV_SK / group=dummycat/*NEW*/ markerattrs=(symbol=trianglefilled
size=8);

  /* Add the Mean Difference Line */

refline &mean_d_BV_SK / axis=y lineattrs=(thickness=2 color=ltgray) label="Mean Diff:
%sysfunc(putn(&mean_d_BV_SK, 5.2))";

  /* Add the Upper and Lower Limits of Agreement */

refline &BV_SK_loa_up &BV_SK_loa_low / axis=y lineattrs=(pattern=dash color=ltgray)
label=(" +1.96*std" "-1.96*std");

refline 0 / axis=y lineattrs=(pattern=dot thickness=2 color=black);

yaxis label="BV by ADP - predicted BV" labelattrs=(size=14 weight=bold) valueattrs=(size=10
weight=bold) min=-10 max=10;

xaxis label="Mean of BV by ADP and predicted BV" labelattrs=(size=14 weight=bold)
valueattrs=(size=10 weight=bold);

keylegend / title="" position=bottom valueattrs=(size=12);

title "Bland & Altman Plot : ADP vs SK at retest";

run;

/*LIN'S CCC*/

proc corr data=analysis outp=CCC noprint;

var BV yhat_BV_SK;

run;

data lin_sk;

set CCC(where=( _type_='CORR' and _name_='BV'));

  /* Pearson's r */

  r_BV_SK = yhat_BV_SK;

set CCC(where=( _type_='STD'));

  s1 = BV;

```

```

s2 = yhat_BV_SK;
set CCC(where=( _type_='MEAN'));
m1 = BV;
m2 = yhat_BV_SK;
/* The 'C_b' bias correction factor */
v = s1 / s2;
u = (m1 - m2) / sqrt(s1 * s2);
cb_BV_SK = 2 / (v + (1/v) + u**2);
/* Lin's CCC */
ccc_BV_SK = r_BV_SK * cb_BV_SK;
keep r_BV_SK cb_BV_SK ccc_BV_SK;
run;
title "Lin's Coefficient";
proc print data=CCC;
run;
proc print data=lin_sk;
run;

/*BIA MODEL DIAGNOSTIC*/
title "BV by BIA: model diagnostic at re-test";
proc reg data=foot plots=diagnostics noprint;
where t=2;
id i;
model BV= dummycat stature R;
output out=analysis r=res_BV_BIA p=yhat_BV_BIA;
run;
quit;
/*Fitline plot*/
proc sgplot data=analysis;
where t=2;
styleattrs axisextent=data backcolor=white wallcolor=white datacontrastcolors=(black gray);
loess x=yhat_BV_BIA y=BV / group=dummycat/*NEW*/ markerattrs=(symbol=trianglefilled size=8)

```

```

        clm clmattrs=(clmfillattrs=(color=ltgray transparency=0.6) clmlineattrs=(color=black
thickness=2)) lineattrs=(pattern=dash thickness=2);
reg x=yhat_BV_BIA y=BV/ nomarkers lineattrs=(color=black pattern=solid thickness=2);
yaxis label="BV by ADP" labelattrs=(size=14 weight=bold) valueattrs=(size=10 weight=bold);
xaxis label="Predicted BV by BIA" labelattrs=(size=14 weight=bold) valueattrs=(size=10 weight=bold);
keylegend / title="" position=bottom valueattrs=(size=12);
title "Fit plot at retest";
run;

/*Bland & Altman plot*/
data analysis /*generate a new work data for maintaining foot values*/;
set analysis;
diff_BV_BIA = BV - yhat_BV_BIA;
avg_BV_BIA = (BV + yhat_BV_BIA) / 2;
run;

proc sql noprint;
    select mean(diff_BV_BIA), std(diff_BV_BIA) into :mean_d_BV_BIA, :std_d_BV_BIA
    from analysis;
quit;

/* Calculate the upper and lower limits of agreement */
%let BV_BIA_loa_up = %sysevalf(&mean_d_BV_BIA + 1.96* &std_d_BV_BIA);
%let BV_BIA_loa_low = %sysevalf(&mean_d_BV_BIA - 1.96* &std_d_BV_BIA);

title1 "BLAND & ALTMAN PLOT FOR BV PREDICITION BY BIA at re-test";
proc sgplot data=analysis;
styleattrs axisextent=data bgcolor=white wallcolor=white datacontrastcolors=(black gray);
scatter x=avg_BV_BIA y=diff_BV_BIA / group=dummycat/*NEW*/ markerattrs=(symbol=trianglefilled
size=8);

    /* Add the Mean Difference Line */
refline &mean_d_BV_BIA / axis=y lineattrs=(thickness=2 color=ltgray) label="Mean Diff:
%sysfunc(putn(&mean_d_BV_BIA, 5.2))";

    /* Add the Upper and Lower Limits of Agreement */

```

```

refline &BV_BIA_loa_up &BV_BIA_loa_low / axis=y lineattrs=(pattern=dash color=ltgray)
label=("+1.96*std" "-1.96*std");

refline 0 / axis=y lineattrs=(pattern=dot thickness=2 color=black);

yaxis label="BV by ADP - predicted BV" labelattrs=(size=14 weight=bold) valueattrs=(size=10
weight=bold) min=-10 max=10;

xaxis label="Mean of BV by ADP and predicted BV" labelattrs=(size=14 weight=bold)
valueattrs=(size=10 weight=bold);

keylegend / title="" position=bottom valueattrs=(size=12);

title "Bland & Altman Plot : ADP vs BIA at retest";

run;

```

```

/*LIN'S CCC*/

```

```

proc corr data=analysis outp=CCC noprint;
var BV yhat_BV_BIA;
run;

```

```

data lin_bia;

set CCC(where=( _type_='CORR' and _name_='BV'));

  /* Pearson's r */

  r_BV_BIA = yhat_BV_BIA;

set CCC(where=( _type_='STD'));

  s1 = BV;

  s2 = yhat_BV_BIA;

set CCC(where=( _type_='MEAN'));

  m1 = BV;

  m2 = yhat_BV_BIA;

  /* The 'C_b' bias correction factor */

  v = s1 / s2;

  u = (m1 - m2) / sqrt(s1 * s2);

  cb_BV_BIA = 2 / (v + (1/v) + u**2);

  /* Lin's CCC */

  ccc_BV_BIA = r_BV_BIA * cb_BV_BIA;

keep r_BV_BIA cb_BV_BIA ccc_BV_BIA;

```

```

run;

title "Lin's Coefficient";

proc print data=CCC;

run;

proc print data=lin_bia;

run;

proc print data=foot (obs=1);

run;

proc sort data=foot;

by t catage;

run;

/*PAIRED T-TEST BETWEEN BC MODELS*/

title "Paired student test for BC models comparisons";

proc ttest data=foot sides=2 plots=(boxplot agreement);

where t=1;

paired BF_2C_Study*(BF_2C_Brozek BF_2C_Lohman BF_2C_Pace BF_2C_Siri BF_3C_Siri);

run;

title "Paired student test for BC models comparisons: by categories";

proc ttest data=foot sides=2 plots=(boxplot agreement);

by catage;

where t=1;

paired BF_2C_Study*(BF_2C_Brozek BF_2C_Lohman BF_2C_Pace BF_2C_Siri BF_3C_Siri);

run;

title "One-Way ANOVA for BC models comparisons within categories";

proc glm data=foot plot=meanplot(clband);

where t=1;

class dummycat;

model BF_2C_Brozek BF_2C_Lohman BF_2C_Pace BF_2C_Siri BF_3C_Siri = dummycat BF_2C_study;

```

```
lsmeans dummymcat / cl pdiff=anom adjust=nelson plot=anom;
run;
quit;
```

```
/*MONTE CARLO FOR MODELS ERROR*/
```

```
data monte_carlo;
```

```
do sim = 1 to 10000;
```

```
int_A = -102.45967 + 5.27906 * rannor(123);
```

```
stat = 165.316 + 6.194 * rannor(123);
```

```
arm = 26.506 + 2.020 * rannor(123);
```

```
hip = 70.106 + 3.734 * rannor(123);
```

```
thigh = 52.828 + 3.352 * rannor(123);
```

```
calf = 35.669 + 2.229 * rannor(123);
```

```
int_B = -49.56459 + 11.76384 * rannor(123);
```

```
sub = 9.173 + 1.980 * rannor(123);
```

```
int_C = -43.47204 + 12.98293 * rannor(123);
```

```
R = 527.038 + 59.145 * rannor(123);
```

```
/* coefficients */
```

```
c_stat_A = 0.35439;
```

```
c_arm = 0.51682;
```

```
c_hip = 0.57547;
```

```
c_thigh = 0.51166;
```

```
c_calf = 0.54422;
```

```
c_cat_A = 1.10793;
```

```
/*SK*/
```

```
c_stat_B = 0.56847;
```

```
c_sub = 1.45497;
```

```
c_cat_B = -1.51037;
```

```
/*BIA*/
```

```
c_stat_C = 0.76056;
```

```
c_R = -0.04875;
```

```
c_cat_C=1.36433;
```

```
ANT = int_A + (stat*c_stat_A) + (arm*c_arm) + (hip*c_hip) + (thigh*c_thigh) + (calf*c_calf) + c_cat_A;
```

```
SK = int_B + (stat*c_stat_B) + (sub*c_sub) + c_cat_B;
```

```
BIA = int_C + (stat*c_stat_C) + (R*c_R) + c_cat_C;
```

```
ANT_noint = (stat*c_stat_A) + (arm*c_arm) + (hip*c_hip) + (thigh*c_thigh) + (calf*c_calf) + c_cat_A;
```

```
SK_noint = (stat*c_stat_B) + (sub*c_sub) + c_cat_B;
```

```
BIA_noint = (stat*c_stat_C) + (R*c_R) + c_cat_C;
```

```
output;
```

```
end;
```

```
run;
```

```
PROC UNIVARIATE DATA=monte_carlo;
```

```
var ANT;
```

```
histogram ANT/normal;
```

```
var SK;
```

```
histogram SK/normal;
```

```
var BIA;
```

```
histogram BIA/normal;
```

```
var ANT_noint;
```

```
histogram ANT_noint/normal;
```

```
var SK_noint;
```

```
histogram SK_noint/normal;
```

```
var BIA_noint;
```

```
histogram BIA_noint/normal;
```

```
run;
```
