# Supplementary material
Source: Research Square preprint supplement (doi:10.21203/rs.3.rs-9493709/v1)
Supplement: Supplementary file 2 [file 9164070c2afb8d8e2ac69be2.docx]

| **Supplementary Table 1**. Stepwise procedure’s steps and criteria statistics. | | | | | | | | |
| --- | --- | --- | --- | --- | --- | --- | --- | --- |
|  | ***Circumferences*** | | | | | | | |
| Step 0 | RMSE | R2 | adj. R2 | AIC | | BIC | Cp | F (0, 79) |
| 6.534 | 0.00 | 0.00 | 383.323 | | 299.649 | 1370.77 | . |
| parameter | estimate | standardized estimate | | | SE | t |  |
| intercept | 57.078 | 0.00 | | | 0.731 | 78.13 |  |
| Step 1 | RMSE | R2 | adj. R2 | AIC | | BIC | Cp | F (1, 78) |
| 3.638 | 0.694 | 0.69 | 290.594 | | 205.972 | 367.347 | 176.89 |
| parameter | estimate | standardized estimate | | | SE | t |  |
| intercept | -28.709 | 0.00 | | | 6.463 | -4.44 |  |
| thigh | 1.624 | 0.833 | | | 0.122 | 13.3 |  |
| Step 2 | RMSE | R2 | adj. R2 | AIC | | BIC | Cp | F (2, 77) |
| 2.706 | 0.833 | 0.829 | 244.193 | | 159.279 | 168.098 | 191.89 |
| parameter | estimate | standardized estimate | | | SE | t |  |
| intercept | -82.244 | 0.00 | | | 8.239 | -9.98 |  |
| stature | 0.439 | 0.416 | | | 0.055 | 8.00 |  |
| thigh | 1.265 | 0.649 | | | 0.101 | 12.49 |  |
| Step 3 | RMSE | R2 | adj. R2 | AIC | | BIC | Cp | F (3, 76) |
| 1.915 | 0.917 | 0.914 | 189.848 | | 106.975 | 47.705 | 281.27 |
| parameter | estimate | standardized estimate | | | SE | t |  |
| intercept | -93.898 | 0.00 | | | 5.979 | -15.70 |  |
| stature | 0.353 | 0.335 | | | 0.04 | 8.84 |  |
| hip | 0.686 | 0.392 | | | 0.078 | 8.82 |  |
| thigh | 0.842 | 0.432 | | | 0.086 | 9.76 |  |
| Step 4 | RMSE | R2 | adj. R2 | AIC | | BIC | Cp | F (4, 75) |
| 1.76 | 0.931 | 0.927 | 177.332 | | 95.266 | 29.841 | 253.33 |
| parameter | estimate | standardized estimate | | | SE | t |  |
| intercept | -92.288 | 0.00 | | | 5.513 | -16.74 |  |
| stature | 0.356 | 0.338 | | | 0.037 | 9.70 |  |
| relaxed arm | 0.599 | 0.185 | | | 0.155 | 3.86 |  |
| hip | 0.548 | 0.313 | | | 0.08 | 6.85 |  |
| thigh | 0.684 | 0.351 | | | 0.089 | 7.67 |  |
| Step 5 | RMSE | R2 | adj. R2 | | AIC | BIC | Cp | F (5, 74) |
| 1.605 | 0.944 | 0.94 | | 163.484 | 83.205 | 13.898 | 247.01 |
| parameter | estimate | standardized estimate | | | SE | t |  |
| intercept | -94.666 | 0.00 | | | 5.061 | -18.70 |  |
| stature | 0.349 | 0.331 | | | 0.033 | 10.39 |  |
| relaxed arm | 0.571 | 0.178 | | | 0.141 | 4.04 |  |
| hip | 0.501 | 0.286 | | | 0.074 | 6.78 |  |
| thigh | 0.499 | 0.256 | | | 0.093 | 5.35 |  |
| calf | 0.489 | 0.167 | | | 0.121 | 4.03 |  |
| Step 6 | RMSE | R2 | adj. R2 | | AIC | BIC | Cp | F (6, 73) |
| 1.516 | 0.95 | 0.946 | | 155.211 | 76.736 | 6.029 | 232.55 |
| parameter | estimate | standardized estimate | | | SE | t |  |
| intercept | -103.027 | 0.00 | | | 5.461 | -18.86 |  |
| category | 1.332 | 0.099 | | | 0.421 | 3.16 |  |
| stature | 0.366 | 0.347 | | | 0.032 | 11.38 |  |
| relaxed arm | 0.558 | 0.173 | | | 0.134 | 4.18 |  |
| hip | 0.580 | 0.332 | | | 0.074 | 7.83 |  |
| thigh | 0.543 | 0.278 | | | 0.089 | 6.08 |  |
| calf | 0.418 | 0.143 | | | 0.117 | 3.58 |  |
|  | ***Skinfold Thickness*** | | | | | | | |
| Step 0 | RMSE | R2 | adj. R2 | | AIC | BIC | Cp | F (0, 78) |
| 6.59 | 0.00 | 0.00 | | 360.835 | 283.265 | 214.27 | . |
| parameter | estimate | standardized estimate | | | SE | t |  |
| intercept | 56.804 | 0.00 | | | 0.761 | 74.65 |  |
| Step 1 | RMSE | R2 | adj. R2 | | AIC | BIC | Cp | F (1, 77) |
| 4.786 | 0.48 | 0.473 | | 313.823 | 236.334 | 78.446 | 67.32 |
| parameter | estimate | standardized estimate | | | SE | t |  |
| intercept | -70.504 | 0.00 | | | 15.526 | -4.54 |  |
| stature | 0.772 | 0.693 | | | 0.094 | 8.21 |  |
| Step 2  (selected at step 4) | RMSE | R2 | adj. R2 | | AIC | BIC | Cp | F (1, 77) |
| 3.579 | 0.713 | 0.705 | | 271.192 | 195.635 | 13.422 | 89.47 |
| parameter | estimate | standardized estimate | | | SE | t |  |
| intercept | -59.594 | 0.00 | | | 11.697 | -5.09 |  |
| stature | 0.611 | 0.548 | | | 0.073 | 8.31 |  |
| subscapular | 0.174 | 0.504 | | | 0.228 | 7.65 |  |
| Step 3 | RMSE | R2 | adj. R2 | | AIC | BIC | Cp | F (1, 77) |
| 3.453 | 0.737 | 0.726 | | 266.784 | 191.713 | 8.672 | 66.18 |
| parameter | estimate | standardized estimate | | | SE | t |  |
| intercept | -48.789 | 0.00 | | | 12.086 | -4.04 |  |
| category | -2.173 | -0.163 | | | 0.863 | -2.52 |  |
| stature | 0.551 | 0.494 | | | 0.075 | 7.36 |  |
| subscapular | 1.737 | 0.503 | | | 0.22 | 7.90 |  |
|  | ***Bio-electrical Impedance Analysis*** | | | | | | | |
| Step 0 | RMSE | R2 | adj. R2 | | AIC | BIC | Cp | F (0, 79) |
| 6.534 | 0.00 | 0.00 | | 383.323 | 301.273 | 137.70 | . |
| parameter | estimate | standardized estimate | | | SE | t |  |
| intercept | 57.078 | 0.00 | | | 0.731 | 78.13 |  |
| Step 1 | RMSE | R2 | adj. R2 | | AIC | BIC | Cp | F (1, 78) |
| 4.675 | 0.495 | 0.488 | | 330.742 | 249.535 | 33.03 | 76.31 |
| parameter | estimate | standardized estimate | | | SE | t |  |
| intercept | -65.562 | 0.00 | | | 14.049 | -4.67 |  |
| stature | 0.742 | 0.703 | | | 0.085 | 8.74 |  |
| Step 2 | RMSE | R2 | adj. R2 | | AIC | BIC | Cp | F (2, 77) |
| 3.945 | 0.645 | 0.636 | | 304.525 | 224.785 | 2.624 | 69.88 |
| parameter | estimate | standardized estimate | | | SE | t |  |
| intercept | -40.045 | 0.00 | | | 12.669 | -3.16 |  |
| stature | 0.724 | 0.686 | | | 0.072 | 10.10 |  |
| R | -0.043 | -0.388 | | | 0.008 | -5.71 |  |
| Note: RMSE, root mean square error; SE, standard error; R, resistance | | | | | | | | |
